# Supplementary material for: Exosome-Derived From Sepsis Patients' Blood Promoted Pyroptosis of Cardiomyocytes by Regulating miR-885-5p/HMBOX1
Source: Frontiers journal article supplement (doi:10.3389/fcvm.2022.774193), 2022-03-08
Supplement: Data_Sheet_1.ZIP [file Data_Sheet_1.ZIP]

## Sheet: IL-1β
number	OD	Con（pg/ml）
blank	0.025	0
S1	0.273	2.5
S2	0.517	5
S3	0.864	10
S4	1.409	20
S5	2.413	40
Vehicle	0.625	6.934
Vehicle	0.704	8.0334
Vehicle	0.649	7.2644
sepsis-exo	1.481	20.661
sepsis-exo	1.506	21.1219
sepsis-exo	1.571	22.3365
control-exo	0.564	6.10839
control-exo	0.611	6.74272
control-exo	0.608	6.70187

## Sheet: IL-18
number	OD	Con（pg/ml）
blank	0.023	0
S1	0.203	10
S2	0.488	20
S3	0.779	40
S4	1.198	80
S5	1.914	160
Vehicle	0.617	30.2426
Vehicle	0.569	27.1423
Vehicle	0.638	31.6376
sepsis-exo	1.381	96.1503
sepsis-exo	1.29	86.665
sepsis-exo	1.268	84.4382
control-exo	0.567	27.0158
control-exo	0.551	26.0115
control-exo	0.519	24.0437
