# Supplementary material for: Exosome-Derived From Sepsis Patients' Blood Promoted Pyroptosis of Cardiomyocytes by Regulating miR-885-5p/HMBOX1
Source: Frontiers journal article supplement (doi:10.3389/fcvm.2022.774193), 2022-03-08
Supplement: Data_Sheet_2.ZIP [file Data_Sheet_2.ZIP]

## Sheet: IL-1β
	number	OD	Con（pg/ml）
	blank	0.029	0
	S1	0.258	2.5
	S2	0.537	5
	S3	0.871	10
	S4	1.415	20
	S5	2.449	40
exo 50μg/ml	0h	0.522	5.52904
	0h	0.581	6.30803
	0h	0.604	6.61653
	12h	0.964	11.7977
	12h	1.022	12.6945
	12h	0.938	11.4013
	24h	1.285	16.9766
	24h	1.316	17.5046
	24h	1.359	18.2452
	48h	1.714	24.7205
	48h	1.679	24.0535
	48h	1.65	23.5055

## Sheet: IL-18
	number	OD	Con（pg/ml）
	blank	0.031	0
	S1	0.282	10
	S2	0.537	20
	S3	0.893	40
	S4	1.435	80
	S5	2.455	160
exo 50μg/ml	0h	0.605	25.625
	0h	0.661	28.6262
	0h	0.63	26.9564
	12h	1.089	53.8049
	12h	1.103	54.6955
	12h	1.041	50.7838
	24h	1.473	79.768
	24h	1.46	78.8369
	24h	1.518	83.0194
	48h	1.68	95.087
	48h	1.601	89.1312
	48h	1.675	94.7061
