# Supplementary material for: Exosome-Derived From Sepsis Patients' Blood Promoted Pyroptosis of Cardiomyocytes by Regulating miR-885-5p/HMBOX1
Source: Frontiers journal article supplement (doi:10.3389/fcvm.2022.774193), 2022-03-08
Supplement: Data_Sheet_4.ZIP [file Data_Sheet_4.ZIP]

## Sheet: IL-1β
	number	OD	Con（pg/ml）
	blank	0.033	0
	S1	0.261	2.5
	S2	0.574	5
	S3	0.902	10
	S4	1.433	20
	S5	2.429	40
	Vehicle	0.741	8.08183
	Vehicle	0.682	7.27369
	Vehicle	0.655	6.91095
exo 50μg/ml	Vector	1.269	16.2596
	Vector	1.412	18.7671
	Vector	1.356	17.7703
	oeHMBOX1	0.658	6.95103
	oeHMBOX1	0.71	7.65457
	oeHMBOX1	0.726	7.87436
mimic	Vector	1.406	18.6594
	Vector	1.352	17.6998
	Vector	1.329	17.2965
	oeHMBOX1	0.728	7.90194
	oeHMBOX1	0.657	6.93767
	oeHMBOX1	0.691	7.3956

## Sheet: IL-18
	样本编号	OD值	浓度（ng/L）
	空白	0.024	0
	S1	0.251	10
	S2	0.562	20
	S3	0.887	40
	S4	1.435	80
	S5	2.449	160
	Vehicle	0.597	25.2241
	Vehicle	0.644	27.697
	Vehicle	0.658	28.4433
exo 50μg/ml	Vector	1.421	75.8713
	Vector	1.552	85.3483
	Vector	1.475	79.7305
	oeHMBOX1	0.671	29.1403
	oeHMBOX1	0.604	25.5892
	oeHMBOX1	0.622	26.5332
mimic	Vector	1.492	80.9592
	Vector	1.439	77.1503
	Vector	1.47	79.3704
	oeHMBOX1	0.611	25.9555
	oeHMBOX1	0.598	25.2762
	oeHMBOX1	0.687	30.0035
