# Supplementary material for: Exosome-Derived From Sepsis Patients' Blood Promoted Pyroptosis of Cardiomyocytes by Regulating miR-885-5p/HMBOX1
Source: Frontiers journal article supplement (doi:10.3389/fcvm.2022.774193), 2022-03-08
Supplement: Data_Sheet_5.ZIP [file Data_Sheet_5.ZIP]

## Sheet: IL-1β
	number	OD	Con（pg/ml）
	blank	0.021	0
	S1	0.278	2.5
	S2	0.55	5
	S3	0.891	10
	S4	1.415	20
	S5	2.426	40
	siNC	0.681	7.45799
	siNC	0.641	6.91241
	siNC	0.629	6.75053
siHMBOX1	Vehicle	1.412	19.0476
	Vehicle	1.559	21.749
	Vehicle	1.486	20.392
	PDTC	0.706	7.80365
	PDTC	0.612	6.52261
	PDTC	0.63	6.76399

## Sheet: IL-18
	样本编号	OD值	浓度（ng/L）
	空白	0.029	0
	S1	0.275	10
	S2	0.569	20
	S3	0.901	40
	S4	1.454	80
	S5	2.462	160
	siNC	0.659	27.6925
	siNC	0.804	35.6104
	siNC	0.684	29.023
siHMBOX1	Vehicle	1.394	72.8419
	Vehicle	1.357	70.2705
	Vehicle	1.481	79.013
	PDTC	0.652	27.3226
	PDTC	0.76	33.1564
	PDTC	0.639	26.6386
