# Supplementary material for: Exosome-Derived From Sepsis Patients' Blood Promoted Pyroptosis of Cardiomyocytes by Regulating miR-885-5p/HMBOX1
Source: Frontiers journal article supplement (doi:10.3389/fcvm.2022.774193), 2022-03-08
Supplement: Data_Sheet_9.ZIP [file Data_Sheet_9.ZIP]

## Sheet: Sheet1
Well	Sample Name	Ct	mRNA		Well	Sample Name	Ct
Control	HMBOX1	24.66	0.0297699		Control	GAPDH	19.59
Control	HMBOX1	24.44	0.0297699		Control	GAPDH	19.37
Control	HMBOX1	24.68	0.0259162		Control	GAPDH	19.41
Vector	HMBOX1	24.25	0.0270168		Vector	GAPDH	19.04
Vector	HMBOX1	24.2	0.0314674		Vector	GAPDH	19.21
Vector	HMBOX1	24.32	0.029977		Vector	GAPDH	19.26
oeHMBOX1	HMBOX1	22.15	0.15283		oeHMBOX1	GAPDH	19.44
oeHMBOX1	HMBOX1	22.24	0.131215		oeHMBOX1	GAPDH	19.31
oeHMBOX1	HMBOX1	22.35	0.137738		oeHMBOX1	GAPDH	19.49
